# Supplementary material for: Label-free biosensor based on dsDNA-templated copper nanoparticles for highly sensitive and selective detection of NAD+
Source: Royal Society of Chemistry journal article supplement (doi:10.1039/c6ra17579a), 2016-01-01

## Electronic Supplementary Information

### **Label-free biosensor based on dsDNA-templated copper nanoparticles for highly sensitive and selective detection of NAD<sup>+</sup>**

Jia Ge,\* Zhen-Zhen Dong, Lin Zhang, Qi-Yong Cai, Dong-Mei Bai, and  
Zhao-Hui Li\*

\*Corresponding author.

College of Chemistry and Molecular Engineering, Zhengzhou University, Zhengzhou  
450001, P. R. China.

Tel.: +86-371-67780037.

E-mail address: [jiage0630@hnu.edu.cn](mailto:jiage0630@hnu.edu.cn) ; [zhaohui.li@zzu.edu.cn](mailto:zhaohui.li@zzu.edu.cn).

**Fig. S1.** Typical TEM image of CuNPs templated by extended Probe 1.

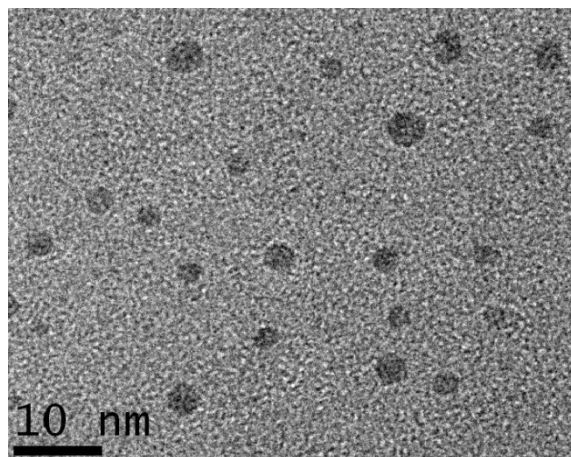

**Fig. S2.** Agarose gel electrophoresis demonstration of the detection of NAD<sup>+</sup> based on dsDNA-templated CuNPs and DNA ligation reaction. lane 1, Probe 1; lane 2, Probe 1 + Probe 2; lane 3, Probe 1 + *E. coli* ligase + KF polymerase + dNTPs; lane 4, Probe 1 + *E. coli* ligase + NAD<sup>+</sup> + KF polymerase + dNTPs. (Probe 1, 1  $\mu$ M; Probe 2, 1  $\mu$ M; *E. coli* ligase, 25 U/mL; NAD<sup>+</sup>, 400 nM; KF polymerase, 10 U/mL; dNTPs, 100  $\mu$ M).

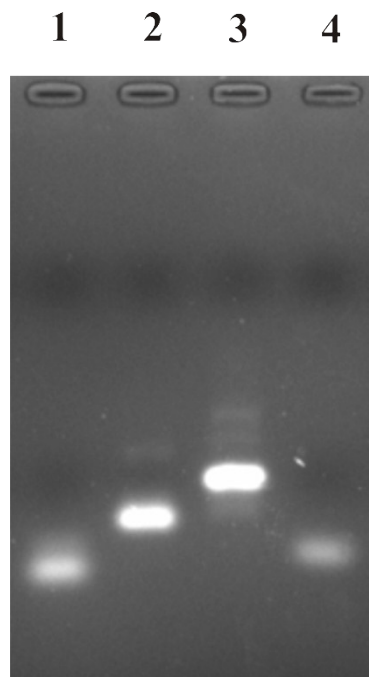

**Fig. S3.** Effect of the length of AT-TA on the formation of dsDNA-templated fluorescent CuNPs.  $F$  and  $F_0$  represent the fluorescence intensities of dsDNA-templated CuNPs platform in the presence and absence of  $\text{NAD}^+$ , respectively. (Probe 1, 500 nM; Probe 3, 500 nM; Probe 4, 500 nM; Probe 5, 500 nM; Probe 6, 500 nM; *E. coli* ligase, 25 U/mL; KF polymerase, 10 U/mL;  $\text{NAD}^+$ , 400 nM; dNTPs, 100  $\mu\text{M}$ ; ascorbate, 5 mM;  $\text{Cu}^{2+}$ , 200  $\mu\text{M}$ ).

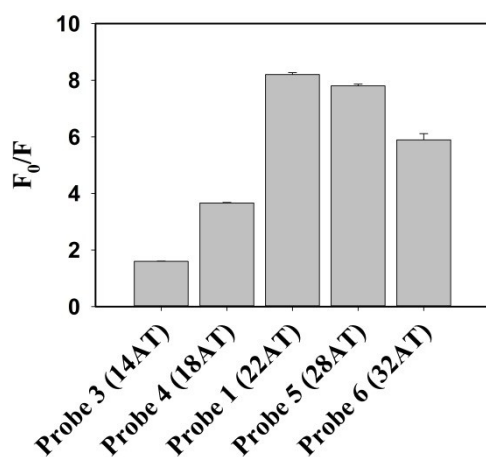

**Fig. S4.** Optimization of  $\text{Cu}^{2+}$  concentration on the formation of fluorescent CuNPs. The results were the average of three repetitive experiments with error bars indicating the standard deviation. (Probe 1, 500 nM; ascorbate, 5 mM).

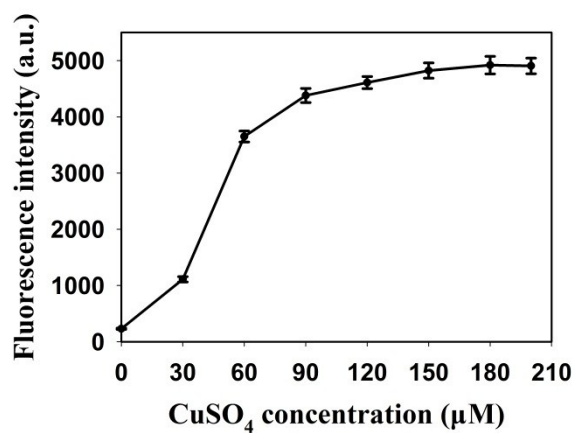

**Fig. S5.** Optimization of ascorbate concentration on the formation of fluorescent CuNPs. The results were the average of three repetitive experiments with error bars indicating the standard deviation. (Probe 1, 500 nM; Cu<sup>2+</sup>, 200 μM).

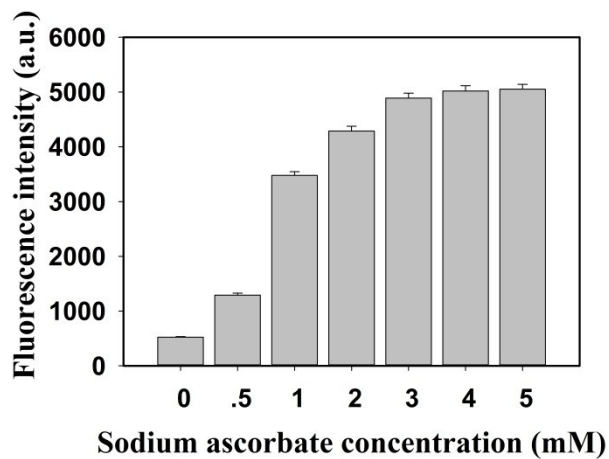

**Fig. S6.** (A) Optimization of dNTPs concentration. The concentration of KF polymerase was 10 U/mL. (B) Optimization of KF polymerase concentration. The concentration of dNTPs was 100  $\mu$ M.  $F$  and  $F_0$  are fluorescence intensities of dsDNA-templated CuNPs platform in the presence and absence of  $\text{NAD}^+$ . (Probe 1, 500 nM; *E. coli* ligase, 25 U/mL;  $\text{NAD}^+$ , 400 nM; ascorbate, 5 mM;  $\text{Cu}^{2+}$ , 200  $\mu$ M).

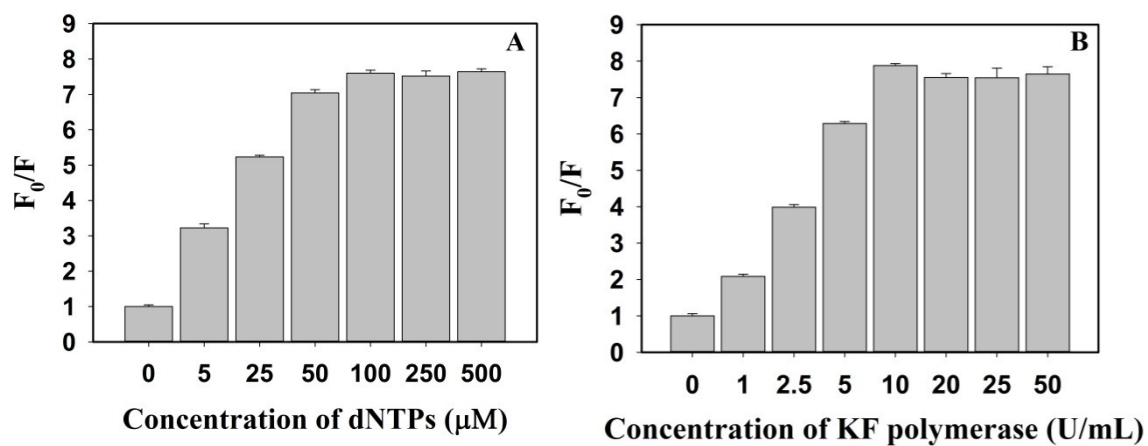

**Fig. S7.** Effect of *E. coli* ligase concentration on fluorescence intensity. The results were the average of three repetitive experiments with error bars indicating the standard deviation. (Probe 1, 500 nM; KF polymerase, 10 U/mL; NAD<sup>+</sup>, 400 nM; dNTPs, 100 μM; ascorbate, 5 mM; Cu<sup>2+</sup>, 200 μM).

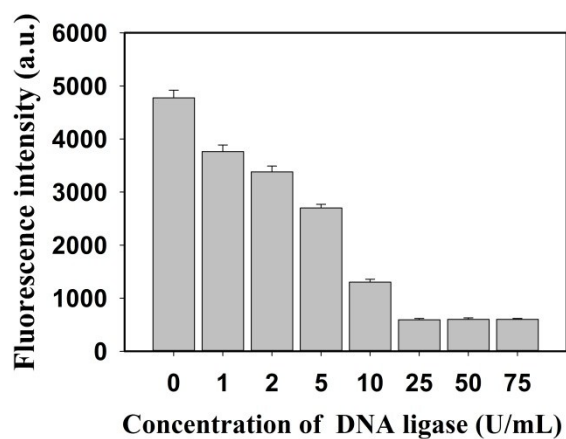



**Fig. S8.** The effect of the reaction time of ligase on the change of the fluorescence intensity of the  $\text{NAD}^+$  sensing system.  $F$  and  $F_0$  represent the fluorescence intensities of dsDNA-templated CuNPs platform in the presence and absence of  $\text{NAD}^+$ , respectively. Error bars were the standard deviation of three measurements. (Probe 1, 500 nM; *E. coli* ligase, 25 U/mL; KF polymerase, 10 U/mL;  $\text{NAD}^+$ , 400 nM; dNTPs, 100  $\mu\text{M}$ ; ascorbate, 5 mM;  $\text{Cu}^{2+}$ , 200  $\mu\text{M}$ ).

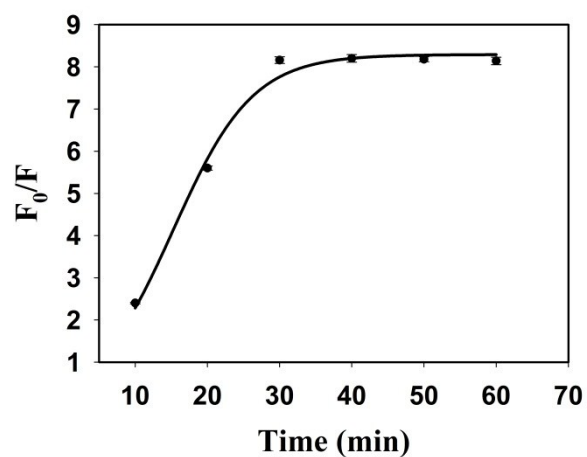

**Fig. S9.** Effect of extension reaction time on fluorescence intensity. The results were the average of three repetitive experiments with error bars indicating the standard deviation. (Probe 1, 500 nM; KF polymerase, 10 U/mL; dNTPs, 100  $\mu$ M; ascorbate, 5 mM;  $\text{Cu}^{2+}$ , 200  $\mu$ M).

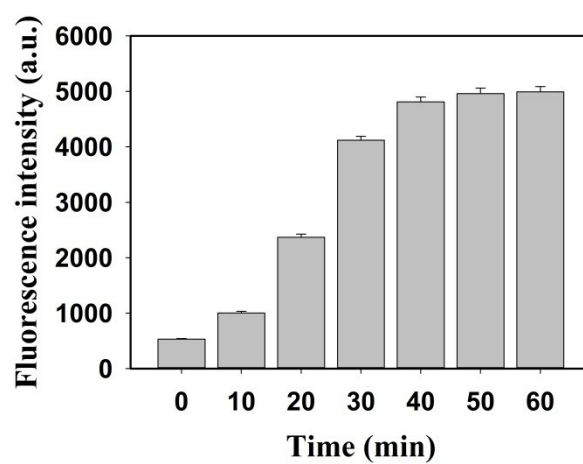

Supplement: c6ra17579a1.pdf [file c6ra17579a1.pdf]
